# Supplementary material for: Improvement in the catalytic activity of cytochrome c by immobilisation on a novel mesoporous silica sheet
Source: Royal Society of Chemistry journal article supplement (doi:10.1039/c3ra45861j), 2013-12-24
Supplement: c3ra45861j.pdf [file c3ra45861j.pdf]

*Electronic Supplementary Information*

**Improvement in the catalytic activity of cytochrome *c*  
by immobilisation on a novel mesoporous silica sheet**

**Kazuma Nakanishi,<sup>a,b</sup> Masahiro Tomita<sup>a</sup> and Katsuya Kato<sup>\*b</sup>**

<sup>a</sup> *Department of Chemistry for Materials, Graduate School of Engineering, Mie University, 1577 Kurimamachiya-cho, Tsu, Mie 514-8570, Japan. Fax: +81 59 231 9430; Tel: +81 59 231 9428; E-mail: Kazuma-nakanishi@aist.go.jp*

<sup>b</sup> *National Institute of Advanced Industrial Science and Technology, 2266-78, Anagahora, Moriyamaku, Nagoya, Aichi 463-8560, Japan. Fax: +81 52 736 7405; Tel: +81 52 736 7551; Corresponding author E-mail: katsuya-kato@aist.go.jp*

## Experimental

### *Materials*

All chemicals were of analytical grade and used without further purification. Cetyltrimethylammonium chloride (CTAC, 326-27712), L-alanine (2701) and palmitoyl chloride (164-00133) were purchased from Wako Pure Chemical Industries, Japan. The tri-block copolymer Pluronic<sup>TM</sup> P123 (molecular formula (EO)<sub>20</sub>(PO)<sub>70</sub>(EO)<sub>20</sub>, 435465) and cytochrome *c* from equine heart (C2506) were purchased from Sigma–Aldrich, St Louis, MO. Tetraethoxysilane (TEOS, KBE-04) and 3-aminopropyltriethoxysilane (APTES, KBE-903) were purchased from Shin-Etsu Chemical Co., Japan. SBA-15 and MCM-41 were prepared according to the procedure reported in the literature.<sup>1</sup>

### *Characterisation*

The morphology of the prepared samples was observed using a FE-SEM (S4300, Hitachi, Japan) operated at an accelerating voltage of 10 kV and a TEM (JEM 2010, JEOL, Japan) operated at 200 kV. The structural properties of the prepared samples were determined using a small-angle X-ray diffractometer (XRD, RINT2100V/PC, Rigaku, Japan) (Fe-K $\alpha$ , 40 kV, 30 mA). The specific surface area and pore volume of the samples were analysed by nitrogen adsorption–desorption isotherms and the pore size distribution curves were obtained by the Barret–Joyner–Halenda (BJH) method using a micrometrics analyser SHIMADZU TriStar 3000, Japan. Oxidation activity of cyt *c* was analysed with a UV–Vis spectrophotometer (V-560, Jasco, Japan) at a wavelength of 500 nm.

## Reference

- 1 T. Orita, K. Kato and M. Tomita, *J. Ceram. Soc. Jpn.*, 2011, **119**, 238–245.

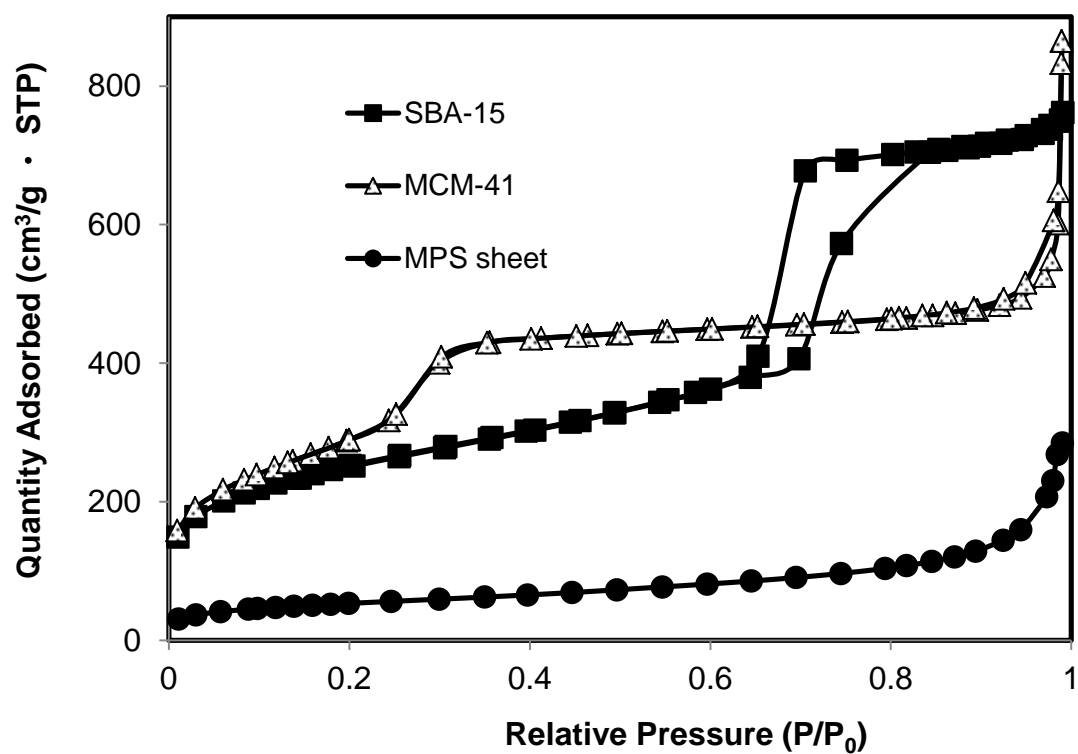

**Fig. S1** Nitrogen adsorption–desorption isotherms of SBA-15, MCM-41 and the MPS sheet.

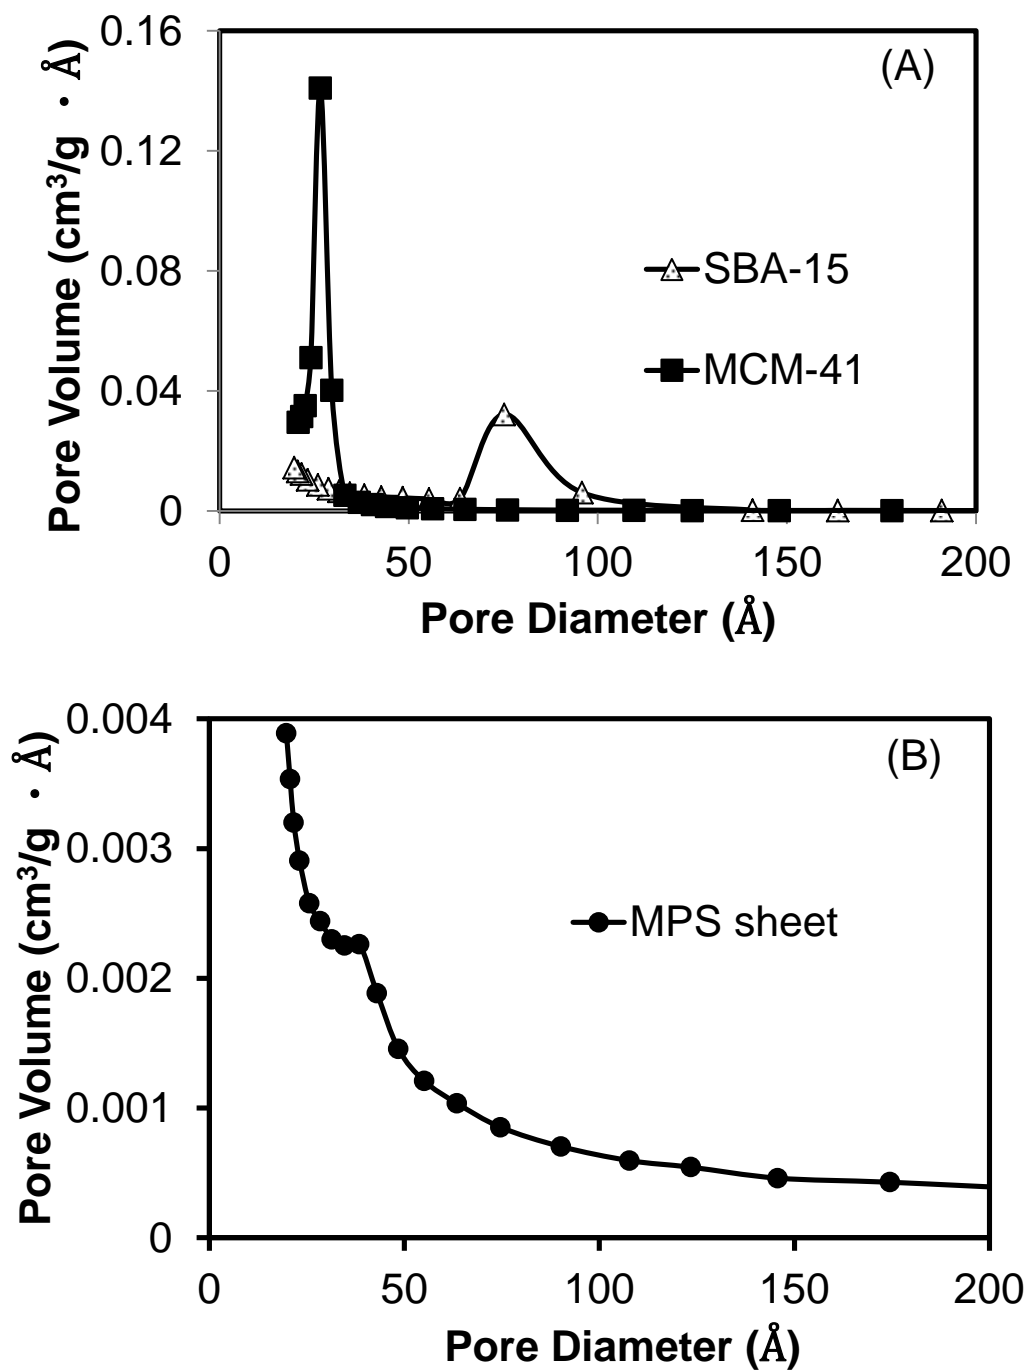

Fig. S2 Pore size distributions of (A) SBA-15 and MCM-41 and (B) MPS sheet.

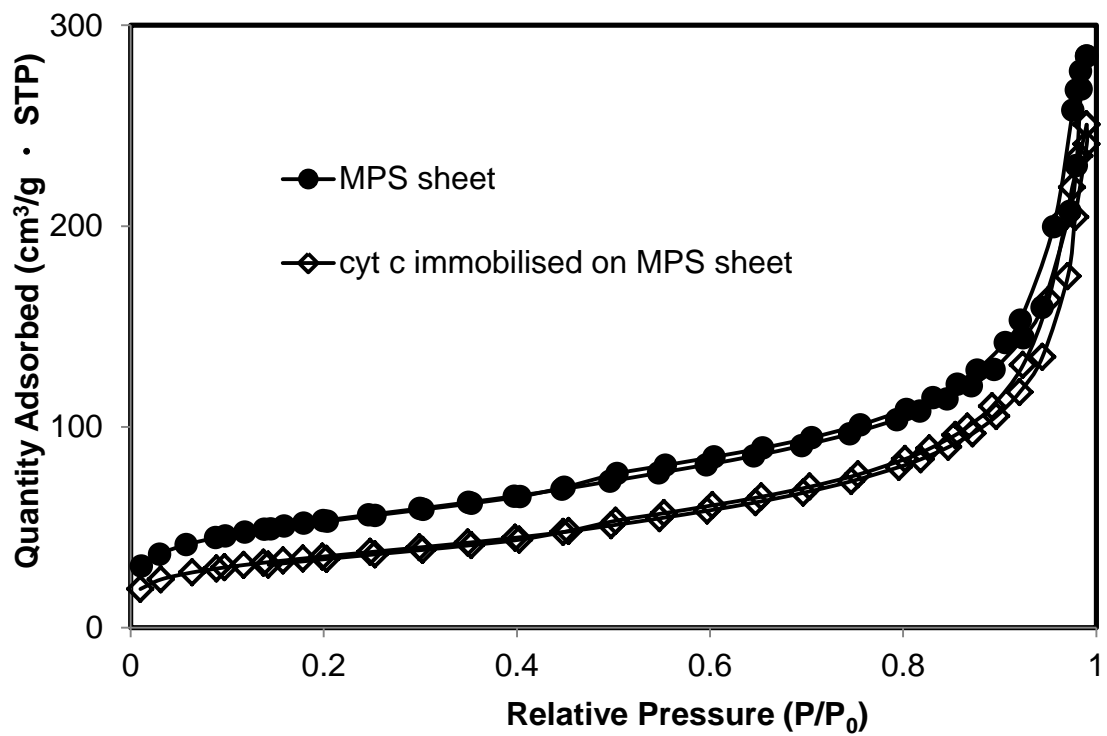

**Fig. S3** N<sub>2</sub> adsorption–desorption isotherms of MPS sheet and cyt *c* immobilised on MPS sheet.

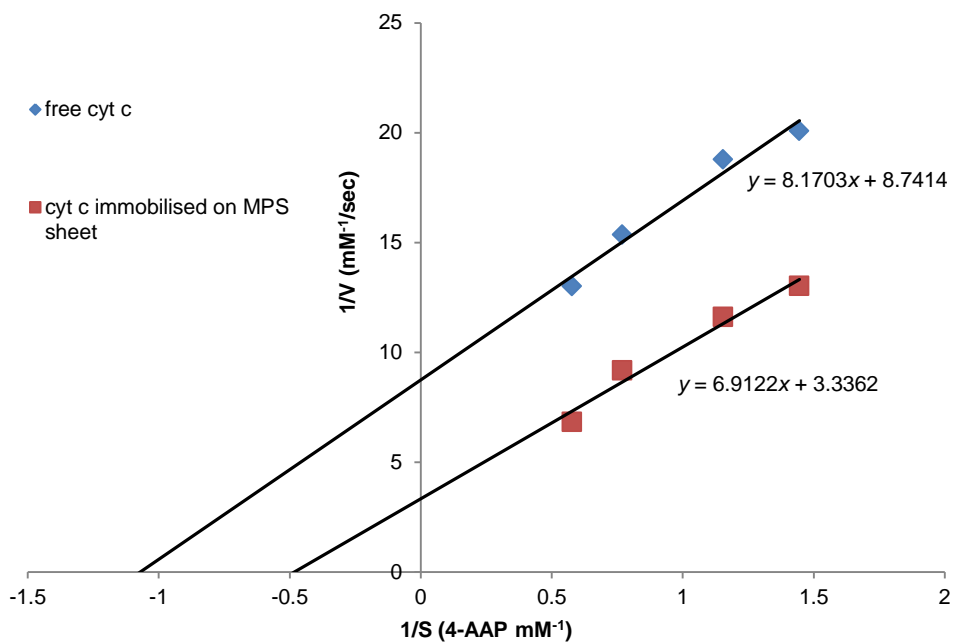

**Fig. S4** Lineweaver–Burk plot of cyt *c* (free and immobilised on the MPS sheet) oxidation activity.
